# Supplementary material for: North Atlantic sea level budget revisited
Source: Copernicus journal article supplement (doi:10.5194/egusphere-2026-802), 2026-02-18
Supplement: Supplementary file [file egusphere-2026-802-AC1-supplement.pdf]

1  
2  
3  
4  
5  
6  
7  
8  
9  
10  
11  
12  
13  
14  
15  
16  
17  
18  
19  
20  
21  
22  
23  
24  
25  
26  
27  
28  
29  
30  
31  
32

## North Atlantic sea level budget revisited

**Zhe Song<sup>1,2</sup>, Anny Cazenave<sup>1</sup>, William Llovel<sup>2</sup>, Andrea Storto<sup>3</sup> and Marie Bouih<sup>4</sup>**

<sup>1</sup>Université de Toulouse, LEGOS (CNES/CNRS/IRD/UT3), 31401 Toulouse, CEDEX 9, France

<sup>2</sup>Université de Bretagne Occidentale, CNRS, Ifremer, IRD, Laboratoire d'Océanographie Physique et Spatiale (LOPS), IUEM, 29280, Plouzané, France

<sup>3</sup>Institute of Marine Science, National Research Council of Italy, Rome, Italy

<sup>4</sup>Magellium, 31520 Ramonville St Agne, France

*Correspondence to:* Zhe Song ([zhe.song@univ-brest.fr](mailto:zhe.song@univ-brest.fr)) and Anny Cazenave ([anny.cazenave@univ-tlse3.fr](mailto:anny.cazenave@univ-tlse3.fr), [anny.cazenave@gmail.com](mailto:anny.cazenave@gmail.com))

~~Submitted to~~ Ocean Science

Revised version

11 May ~~February~~ 2026

### 33 **Abstract**

34 Based on satellite altimetry, GRACE space gravimetry and Argo-based steric data down to  
35 2000m, recent studies have shown that the North Atlantic sea level budget (i.e., altimetry-based  
36 sea level minus sum of components) of the past two decades is not closed, with strong regional  
37 residuals in the North Atlantic. This was suggested to result from salinity errors reported since  
38 ~2015 in some Argo float measurements. In this study, we revisit the North Atlantic sea level  
39 budget, using satellite altimetry, GRACE and GRACE-FO data, different Argo products and  
40 two ocean reanalyses (CIGAR and ORAS5) over the 2004-2022 time span. The ocean  
41 reanalyses are used to estimate the manometric contribution, an alternative to using GRACE  
42 data, as well as the deep ocean contribution to the sea level budget, not yet fully sampled by  
43 Argo. Analyzing different data sets allows us to evaluate their impact on the previously  
44 reported non-closure of the North Atlantic sea level budget. We first find that using the CIGAR  
45 ocean reanalysis-based manometric component significantly reduces the residuals of the North  
46 Atlantic sea level budget compared to GRACE. We also find that accounting for the deep ocean  
47 (below 2000m) thermal expansion (using the CIGAR reanalysis) allows for 30% reduction of  
48 the North Atlantic budget residuals when using GRACE for the manometric component, while  
49 the mean residual trend is reduced by a factor of 2 when using CIGAR for the manometric sea  
50 level. In the latter case, the budget is closed within data uncertainties. -The North Atlantic  
51 halosteric component based on Argo and CIGAR in the upper 2000m displays a small decrease  
52 since the early 2010s. However, this negative trend becomes stronger after 2016. The 2010-  
53 2016 halosteric decrease may reflect a real salinity increase in the region, although salinity  
54 measurement errors may have impacted the halosteric component after that date.

55

## 56 1 Introduction

57 While many studies have been devoted to assessing the global mean sea level budget over the  
58 satellite altimetry era (1993 to present) (e.g., Barnoud et al., 2021; Bouih et al., 2025; Chen et  
59 al., 2020; Dieng et al., 2017; Horwath et al., 2022; Llovel et al., 2023; Nerem et al., 2018;  
60 WCRP, 2018) , only a few have focused on the regional sea level budget, with mixed results  
61 (e.g., Bouih et al., 2025; Camargo et al., 2023; Frederikse et al., 2016; Hamlington et al., 2020;  
62 Mu et al., 2024; Royston et al., 2020). At the global scale, the main terms of the sea level budget  
63 are the global mean sea level rise, ~~and~~ ocean mass (known as barystatic sea level, Gregory et  
64 al., 2019), and thermosteric sea level changes. At regional scale, however, other factors play a  
65 non-negligible role, such as the halosteric (i.e., salinity-related) component, which makes the  
66 regional sea level budget more complex to assess. In effect, a spurious salinity drift (giving rise  
67 to an important halosteric component decrease) has been reported recently in some Argo-based  
68 measurements (Liu et al., 2020; Ponte et al., 2021; Wong et al., 2023), that is supposed to have  
69 a strong impact on the closure assessment of the regional sea level budget. Considering all  
70 ocean basins, a recent study (Bouih et al., 2025) investigated the regional sea level trend budget  
71 closure over the 2004-2022 time span, using altimetry-based sea level data, GRACE space  
72 gravimetry for the regional ocean mass variations (also called manometric component, Gregory  
73 et al., 2019) and Argo data for the steric (sum of thermosteric and halosteric terms) component  
74 down to 2000m (global mean trends removed from all data sets). Bouih et al. (2025) also  
75 considered several ocean reanalyses to compute the manometric component (an alternative to  
76 using GRACE data), following the approach developed by Camargo et al. (2023), i.e., using  
77 the stereodynamic sea level (Gregory et al., 2019) computed by the reanalysis and correcting it  
78 for the local steric effect. The Bouih et al. (2025)'s study showed that in the Pacific, Indian and  
79 South Atlantic oOceans, the sea level budget trend residuals (altimetry-based sea level minus  
80 sum of components) were non-significant, considering the data uncertainties. On the other hand,  
81 strong positive residuals were found in the North Atlantic, whatever the manometric

82 component considered (i.e., either from GRACE or from the ocean reanalyses). These authors  
83 suspected the Argo-based spurious halosteric component (impacted by the Argo-based salinity  
84 drift) as the cause of the non-closure of the sea level budget in the North Atlantic.

85 In the present study we revisit the question of the North Atlantic sea level budget over the  
86 2004-2022 time span, using a variety of different data sets for the components of the sea level  
87 budget: different GRACE mascon solutions and different Argo-based gridded products down  
88 to 2000m, as well as two ocean reanalyses that provide an estimate of the steric signal from the  
89 deep ocean. Our objective is to evaluate the impact of each product on the currently reported  
90 non-closure of the North Atlantic sea level budget. An important addition, compared to the  
91 Bouih et al. (2025)'s study, ~~indeed~~ consists of accounting for the deep ocean warming below  
92 2000m (not sampled by Argo) using estimates from the ocean reanalyses. This paper is  
93 organized as follows. Section 2 presents the data and analysis method. Section 3 displays the  
94 results for the North Atlantic sea level budget, both in terms of trend maps and time series. The  
95 sea level budget excluding the North Atlantic (average over all other oceans) is also briefly  
96 discussed in that section. A synthesis of the results is presented in the Discussion section  
97 (section 04) with some highlights on the few main messages arising from this study.

## 98 **2 Data and methods**

### 99 **2.1 Data**

#### 100 *2.1.1 Altimetry-based total sea level*

101 Sea level variations have been continuously measured by satellite altimetry since 1993. In this  
102 study, we use the daily  $0.25^\circ \times 0.25^\circ$  gridded sea level anomaly data, version DT2021 available  
103 from the Copernicus Climate Change Service (C3S) (<https://cds.climate.copernicus.eu/>). The  
104 data set is further corrected for the TOPEX-A instrumental drift that affected the first 6 years  
105 of the time series, but the correction has no impact on our assessment that starts in 2004. The

106 Jason-3 radiometer drift that impacts the wet troposphere correction (Brown et al., 2023) is  
 107 corrected for. The altimetry data set is also corrected for the absolute Glacial Isostatic  
 108 adjustment (GIA) effect, using the ICE6G-D model from Peltier et al. (2018).

### 109 *2.1.2 GRACE-based ocean mass*

110 The Gravity Recovery and Climate Experiment (GRACE) and GRACE Follow-On (GRACE-  
 111 FO) are joint missions by the National Aeronautics and Space Administration (NASA) and the  
 112 German Aerospace Center (DLR) (Tapley et al., 2019). These satellites have been measuring  
 113 temporal variations in Earth's gravity field since 2002. This data set is essential for estimating  
 114 mass redistribution in the oceans, terrestrial water storage, ice sheets, and glaciers.  
 115 GRACE/GRACE-FO data are generally available in two forms: Spherical Harmonic (SH)  
 116 coefficients and Mass Concentration (mascon) solutions. In this study, we utilize the latest  
 117 Release 6 (RL06) mascon solutions provided by three different institutions: the Center for  
 118 Space Research (CSR), the Jet Propulsion Laboratory (JPL), and the Goddard Space Flight  
 119 Center (GSFC)~~German Research Centre for Geosciences (GFZ)~~. These mascon solutions, at  
 120 monthly temporal resolution, are corrected for the geocentric motion (degree-1) using the Sun  
 121 et al. (2016) solution. The  $C_{20}$  and  $C_{30}$  coefficients are derived from Satellite Laser Ranging  
 122 (SLR) data. The GIA correction for GRACE is based on the ICE6G-D model from (Peltier et  
 123 al. (2018). Additionally, the GAD product derived from AOD1B models (Dobslaw et al., 2017;  
 124 Flechtner et al., 2014), which represents non-tidal atmospheric and oceanic mass redistribution,  
 125 is added back over the ocean areas to restore the ocean bottom pressure, which combines the  
 126 effects of ocean mass and atmospheric loading. For alignment with altimetry-based sea level  
 127 data which are corrected for the inverse barometer, we remove the global mean atmospheric  
 128 pressure at every grid mesh in GRACE/GRACE-FO ocean mass data using the spatial mean of  
 129 the GAD product at each month (Chen et al., 2019). In this study, we ~~both~~ use the ensemble  
 130 mean of individual the three their mascon solutions ~~as well as their ensemble mean~~.

### 131 2.1.3 Argo-based gridded data

132 The Argo program is an international observational network that deploys a global array of  
133 autonomous profiling floats to measure temperature and salinity in the upper 2000m of the  
134 ocean. Several institutions process the raw data from these floats and publish gridded  
135 temperature (T) and salinity (S) data [sets](#). In this study, we utilize three distinct gridded  
136 products: the Scripps Institution of Oceanography (SIO, Roemmich and Gilson, 2009), the  
137 Japan Agency for Marine-Earth Science and Technology (JAMSTEC, Hosoda, 2007), and the  
138 Met Office Hadley Centre (EN4 product, version 2.2, Cheng et al., 2014). Note that the SIO  
139 product rejects salinity profiles exceeding a difference of 0.1 psu when comparing to historical  
140 estimate based on the WOCE Global Hydrographic Climatology (Roemmich and Gilson, 2009).  
141 This correction tends to withdraw the salinity drift reported in Argo floats since 2016 (Liu et  
142 al., 2020; Ponte et al., 2021; Wong et al., 2023). Note that the other two products do not apply  
143 such a correction. All three data products are available at [https://argo.ucsd.edu/data/data-](https://argo.ucsd.edu/data/data-access/)  
144 [access/](https://argo.ucsd.edu/data/data-access/) (downloaded in October 2025). The thermosteric, halosteric and total steric sea level  
145 time series are computed from these gridded temperature and salinity data using the Gibbs  
146 SeaWater (GSW) Oceanographic Toolbox (McDougall et al., 2011) which implements the  
147 2010 Thermodynamic Equation Of Seawater (TEOS-10) standard. The gridded Argo-based  
148 time series have a spatial resolution of  $1^{\circ} \times 1^{\circ}$  at monthly interval over January 2004 to  
149 December 2022.

### 150 2.1.4 Ocean reanalyses

151 We also used two ocean reanalysis data sets: (1) the CNR-ISMAR Global Historical Reanalysis  
152 (CIGAR, Storto and Yang, 2024), and (2) the Ocean Reanalysis System 5 (ORAS5, Zuo et al.,  
153 2019) available from the Copernicus Climate Change Service  
154 (<https://www.copernicus.eu/en/copernicus-services>).

155 CIGAR is a reanalysis system developed by Storto and Yang (2024). Its resolution is  $1^\circ \times 1^\circ$ . It  
156 is based on the NEMO ocean model version 4.0.7 (<https://www.nemo-ocean.eu/>) and is forced  
157 by the ~~ECMWF~~ ERA5 atmospheric reanalysis from the European Center for Medium-range  
158 Weather Forecast (ECMWF) ([https://www.ecmwf.int/en/forecasts/dataset/ecmwf-reanalysis-](https://www.ecmwf.int/en/forecasts/dataset/ecmwf-reanalysis-v5)  
159 [v5](https://www.ecmwf.int/en/forecasts/dataset/ecmwf-reanalysis-v5)). The system uses a three-dimensional variational (3D-Var) scheme to assimilate in situ  
160 profiles from the EN4 data set. Notably, CIGAR does not assimilate satellite altimetry data,  
161 which allows for independent comparisons. The system consists of 32 ensemble members  
162 generated through varying configurations (e.g., perturbed initial conditions and atmospheric  
163 forcing). In this study, we use the ensemble mean of the 32 members to derive the thermosteric,  
164 halosteric and steric sea level.

165 The ORAS5 ocean reanalysis is based on the NEMO model (v3.4.1) and uses the NEMOVAR  
166 data assimilation system. It assimilates a wide range of observations, including satellite  
167 altimetry and sea surface temperature, at an eddy-permitting resolution of  $0.25^\circ \times 0.25^\circ$ .

## 168 **2.2 Methods**

### 169 *2.2.1 Computation of the manometric component*

170 In this study, we utilize two methods to obtain an estimate of the manometric component. One  
171 method is to use the ensemble mean of the GRACE mascon solutions from CSR, JPL, and  
172 GSFC to obtain the GRACE-based manometric estimate. The other method, an alternative to  
173 using GRACE solutions, relies on ocean reanalysis data and follows the approach developed  
174 by Camargo et al. (2023). Here, we use the sterodynamic sea level provided by the CIGAR  
175 ocean reanalysis, which combines ~~steric the global mean thermosteric~~ and dynamic sea level  
176 changes. To isolate the manometric component, we subtract the local steric effect from the  
177 sterodynamic sea level and further add the contemporary Gravitational, Rotational, and  
178 Deformation (GRD) fingerprints (representing solid Earth deformations and gravitational  
179 effects due to present-day land ice melt and terrestrial water storage changes; Gregory et al.,

180 2019), to obtain a manometric component comparable to GRACE. The sea level fingerprint  
181 data used in this study are based on monthly GRD fingerprint grids (~~0.5°×0.5°~~0.5°×0.5°  
182 resolution) estimated by Adhikari et al. (2019). Since this original dataset ends in 2016, we  
183 extended the time series up to 2022 using linear extrapolation, assuming that the observed trend  
184 remains constant after 2016 (see Bouih et al., 2025 for details). This reanalysis-based estimate  
185 is hereafter referred to as CIGAR manometric. Manometric sea level change generally refers  
186 to the sea level component associated with ocean mass variations (~~i.e., excluding the steric~~  
187 ~~component~~). It is driven by water mass exchange with the continents (such as land ice melt and  
188 terrestrial water storage changes) as well as mass redistribution within the ocean, driven by  
189 ocean circulation. However, in the context of this study, we focus exclusively on the internal  
190 mass redistribution component (with the global mean ocean mass trend removed). Therefore,  
191 the 'manometric sea level' here refers solely to the redistribution by the ocean circulation, of  
192 water mass already present in the oceans, with the GRDs effect added as explained above.

193

#### 194 2.2.2 Post processing of the data

195 To ensure spatial consistency across all observing systems, all gridded data sets were spatially  
196 interpolated onto a  $1^\circ \times 1^\circ$  grid and averaged at monthly interval. A three-month moving  
197 average filter was applied to the time series. For the spatial analysis, a common mask was  
198 applied to all gridded components to exclude regions with high uncertainty. This mask covers  
199 latitudes from 66°S to 66°N, excludes inland seas, and omits coastal regions where the distance  
200 from land is less than 300 km (see Bouih et al., 2025 for details). Seasonal signals (annual and  
201 semi-annual) are removed from the time series through a least-squares adjustment of 6 and 12-  
202 month sinusoids. For the spatial maps, this least-squares fit was used to calculate the trends at  
203 each grid point. Finally, the globally averaged trend of each data set computed over the study

204 period was subtracted from each grid point before constructing the spatial trend maps to focus  
205 on regional spatial patterns. The study period spans from January 2004 to December 2022.

### 206 2.2.3 Data uncertainties

207 For the altimetry grids, we use the uncertainties estimated by Prandi et al. (2021). For the  
208 GRACE-based manometric component, uncertainties are derived from the dispersion of the  
209 data sets with respect to the ensemble mean. For the CIGAR-based manometric, thermosteric,  
210 halosteric and steric data, the dispersion of the 32 realizations around the ensemble mean was  
211 used to estimate the uncertainties. For the residual time series, the uncertainty was estimated  
212 using the law of error propagation, considering all terms of the sea level budget. Regarding the  
213 trend uncertainty, it is expressed as the standard error of the least-squares fit. To obtain the  
214 uncertainty at the 95% confidence level, we scaled the standard error by a factor of 2  
215 (representing the 2-sigma interval).

## 216 3 Results

### 217 3.1 Comparison of the different manometric components over the North Atlantic

218 ~~Figure 1~~~~Figure 1~~Figure 1a, b, shows the spatial manometric trend in the North Atlantic using  
219 the GRACE and CIGAR manometric data. Comparing Figure 1(a) and (b), we distinctly  
220 observe ~~distinctly~~contrasting patterns between the GRACE and CIGAR manometric  
221 components. For the GRACE-based component, significant negative trends dominate most of  
222 the basin, with magnitudes gradually weakening from east to west. However, positive trends  
223 are observed in the western tropical Atlantic. In contrast, the CIGAR manometric component  
224 displays positive trends in the east and negative trends in the west, separated by a distinct  
225 dividing line, which likely corresponds to the position of the Mid Atlantic Ridge.

226 ~~Figure 1~~~~Figure 1c~~ also shows the ‘Altimetry minus SIO-based steric 0-2000m’ trends. This  
227 map is supposed to represent the manometric component, plus any deep ocean contribution.

228 Comparing Figure 1c with Figure 1a-b, we note a better agreement between  
 229 ‘Altimetry minus SIO’ and CIGAR manometric in the Eastern Atlantic, both maps showing  
 230 positive trends, while unlike the GRACE manometric trends are negative in this region. On the  
 231 other hand, it is worth noting that the positive trend area seen in the GRACE manometric map  
 232 in the western Atlantic around 30°N is also seen in the ‘Altimetry minus SIO’ trend map, but  
 233 not in the CIGAR manometric map.  
 234 Over all, such comparisons point to problems in GRACE data in the eastern North Atlantic  
 235 region.

236

237

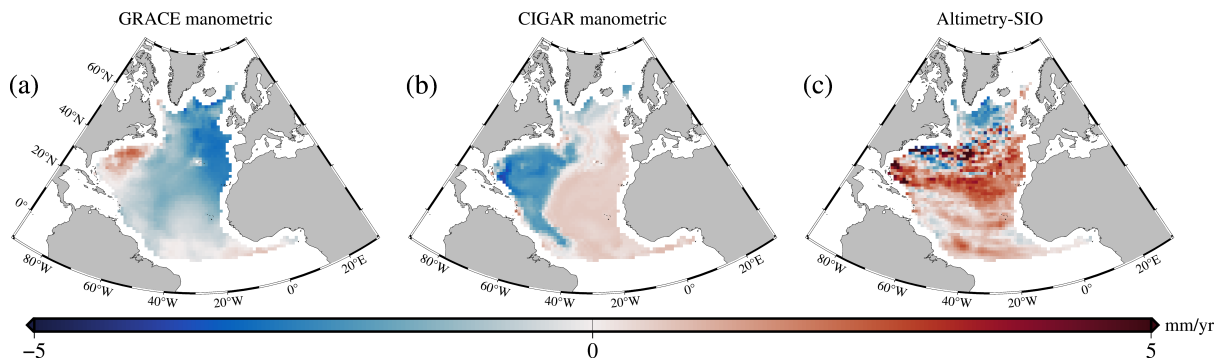

238

239 *Figure 1. Manometric sea level trends in the North Atlantic over 2004.01-2022.12 derived from*  
 240 *(a) the mean of three GRACE mascon solutions, ~~and~~ (b) the CIGAR ocean reanalysis and (c)*  
 241 *‘Altimetry minus SIO-based steric sea level 0-2000m’. ~~Difference between (a) and (b).~~*  
 242

### 243 3.2 Comparison of the different steric products over the North Atlantic

244 Figure 3a-c shows the thermosteric sea level (TSL) trends over 2004-  
 245 2022 over the North Atlantic for the three Argo products SIO, JAMSTEC and EN4. Similarly,  
 246 Figure 3d-f shows the halosteric sea level (HSL) trends for the same data sets  
 247 and period. As expected, due to thermohaline compensation particularly strong in the North

248 Atlantic (e.g., Pardaens et al., 2011; Wang et al., 2010; Wunsch et al., 2007), the two  
249 components display opposite trends. Regarding the thermosteric component ([Figure 3](#)~~Figure~~  
250 ~~23~~[Figure 3a-c](#)), while all three products display similar spatial patterns, their magnitudes vary.  
251 The JAMSTEC and EN4 products show stronger positive trends around 20°N compared to the  
252 SIO product. However, all three products indicate significant positive signals in the eastern  
253 North Atlantic. The three halosteric products share similar spatial patterns; however, the  
254 magnitude of the SIO product is notably smaller than for JAMSTEC and EN4, the latter two  
255 being very similar. This difference likely results from the SIO processing that corrects for the  
256 instrumental salinity drift reported in Argo floats since 2016, whereas the other products ~~do~~  
257 not account for this. The mapping methods used by the different processing groups, in  
258 particular the assumed different correlation radii, may also contribute to the observed  
259 differences.

260 The steric sea level (SSL) trends are shown in [Figure 3](#)~~Figure 23~~[Figure 3g-i](#). The magnitude of  
261 the total steric change is smaller than that of the thermosteric component alone. This implies  
262 that the halosteric contribution plays a significant compensatory role in the North Atlantic  
263 (consistent with previous published studies; e.g., [Bouih et al., 2025](#); [Llovel and Hochet, 2025](#))  
264 (e.g., [Bouih et al., 2025](#); [Llovel and Hochet, 2025](#)). Unlike in the case of the global mean, the  
265 influence of salinity changes on sea level cannot be ignored in this region.

266

267

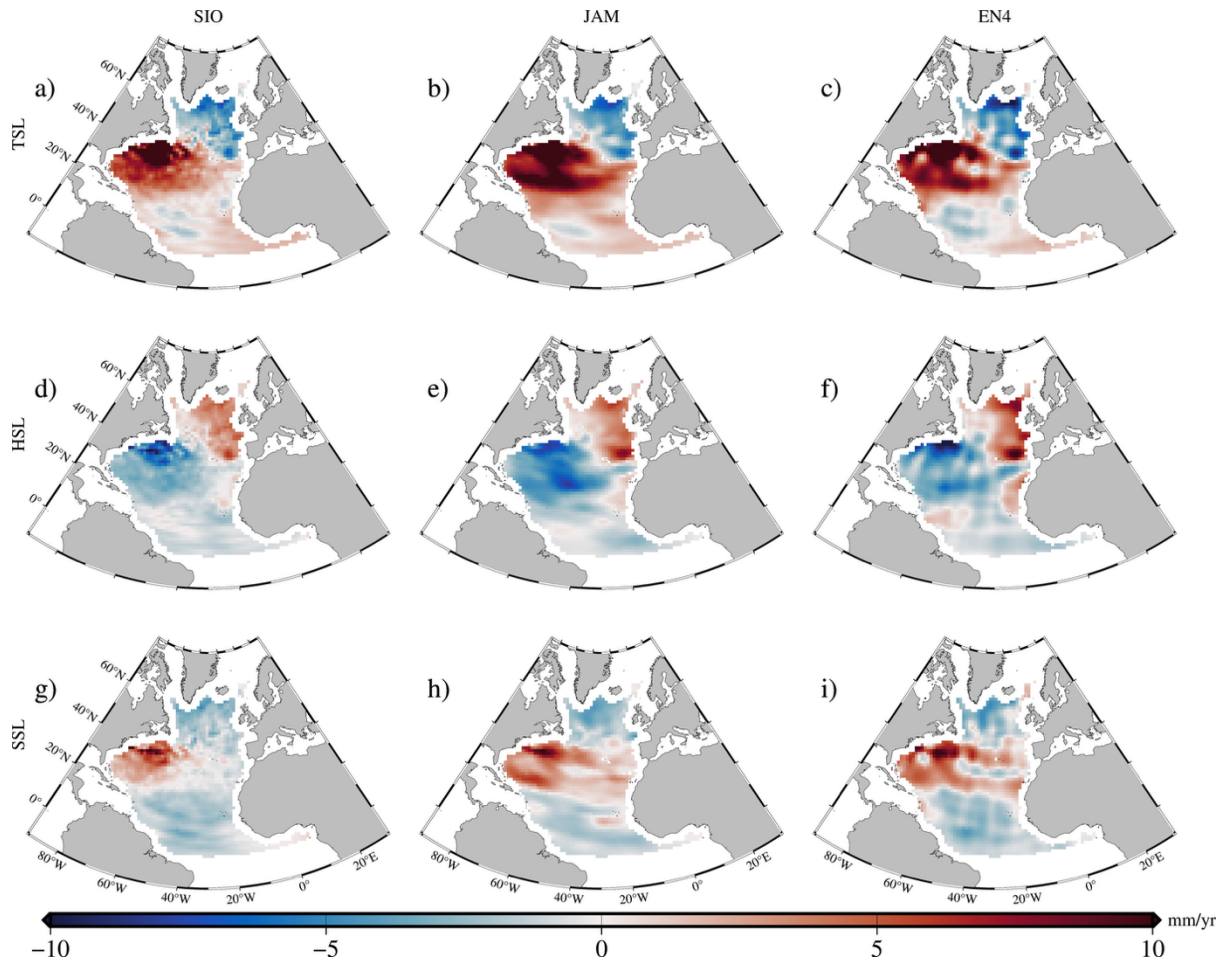

268

269 *Figure 2. Trends of thermosteric (a–c), halosteric (d–f), and steric (g–i) sea level change in*  
 270 *the North Atlantic over 2004–2022 derived from the SIO (a, d, g), JAMSTEC (b, e, h), and EN4*  
 271 *(c, f, i) Argo products.*

272

### 273 3.2.1 Ocean reanalyses-based thermosteric, halosteric and steric products

274 In addition to Argo products, we used the CIGAR and ORAS5 ocean reanalysis data to compute  
 275 thermosteric, halosteric, and steric sea level changes for both the upper 2000m and the deep

276 ocean (2000m-6000m), as shown in ~~Figure 3~~~~Figure 3~~~~Figure 3~~. In the upper 2000m, CIGAR  
277 and ORAS5 exhibit similar spatial patterns across all three components. Notably, the  
278 thermosteric sea level change displays a significant signal in the western North Atlantic,  
279 consistent with the Argo-based results. However, marked discrepancies between the two  
280 reanalyses are evident below 2000m. The CIGAR product displays strong positive thermosteric  
281 and negative halosteric signals in the western North Atlantic compared to ORAS5. In contrast,  
282 the deep ocean signals in ORAS5 are weak. The contrasting results of the two reanalyses for  
283 the deep ocean are puzzling and need to be investigated further. .-and spatially incoherent, with  
284 some areas showing even signs opposite to those observed in the upper 2000m. Consequently,  
285 the spatial patterns in CIGAR, triggered by vertical physics and, to a lesser extent, vertical error  
286 correlations embedded in the 3D-Var scheme, appear more consistent with the upper 2000m  
287 than those in ORAS5.  
288

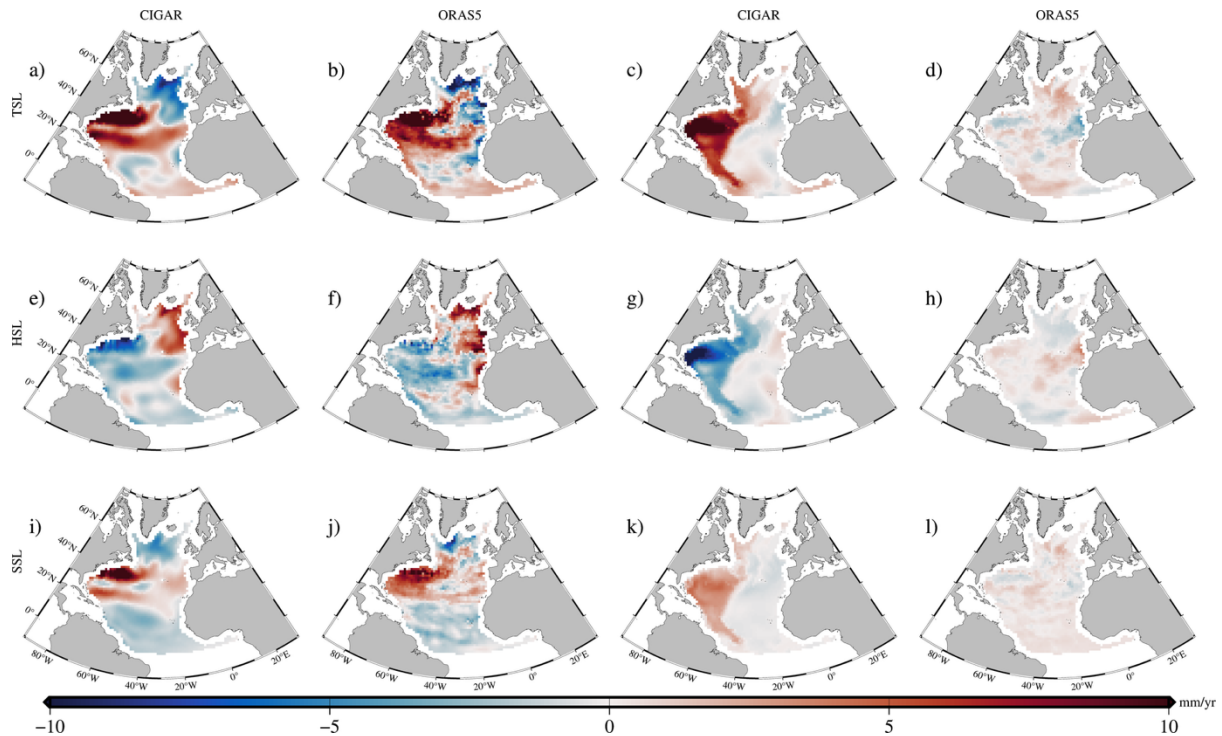

289

290 *Figure 3. Trends of thermosteric (a–d), halosteric (e–h), and steric (i–l) sea level change in*  
 291 *the North Atlantic over 2004–2022. The panels compare contributions from the upper 2000 m*  
 292 *(a, b, e, f, i, j) and below 2000 m (c, d, g, h, k, l) derived from the CIGAR (a, c, e, g, i, k) and*  
 293 *ORAS5 (b, d, f, h, j, l) reanalyses.*

294

### 295 3.2.2 Argo-based and ocean reanalysis thermosteric, halosteric and steric time series

296 Next, we examine the thermosteric, halosteric and steric time series (weighted averages of the  
 297 gridded data in the North Atlantic) for the different Argo and ocean reanalysis product ([Figure](#)  
 298 [4Figure 4Figure 4](#)). [Figure 4Figure 4Figure 4](#)a,d indicate that the thermosteric component  
 299 exhibits a positive an upward trend in all products, although the rates of rise vary. Regarding  
 300 the halosteric component ([Figure 4Figure 4Figure 4](#)b,e), we observe that the SIO and CIGAR  
 301 products show a small negative decreasing trend that begins earlier than 2016, which may  
 302 represent a true physical salinity increase during this early period. Among the three Argo

303 products (~~Figure 4~~~~Figure 4~~~~Figure 4~~a-c), SIO and EN4 show strong agreement in thermosteric,  
304 halosteric, and steric sea level changes. In contrast, JAMSTEC deviates from the other two  
305 products, particularly in the halosteric component, which displays an unrealistic increase  
306 during the 2010s. Consequently, this discrepancy causes the total steric sea level change in  
307 JAMSTEC to mismatch with the other two products. In the following, we exclude the  
308 JAMSTEC product from the subsequent analysis.

309 ~~Figure 4~~~~Figure 4~~~~Figure 4~~d-i presents the changes for CIGAR and ORAS5 in the upper 2000m  
310 ocean depth and from 2000m to 6000m (deep ocean). In the upper 2000m, Although there is a  
311 little difference in trend before 2010, they are consistent across components after 2010,  
312 although their amplitudes slightly differ. However, in the deep ocean (2000–6000m),  
313 substantial discrepancies exist between the two products. As mentioned above, ORAS5  
314 exhibits a weak signal in the deep ocean; its thermosteric trend is nearly zero until 2019. In  
315 contrast, CIGAR shows a consistent and distinct upward trend. Regarding the halosteric change,  
316 ORAS5 shows a small~~weakly~~ rising trend until 2019, whereas CIGAR shows a consistent and  
317 obvious decrease. Finally, while both products exhibit rising trends in steric sea level change  
318 in the deep ocean, their magnitudes differ significantly. Given the unrealistically stationary

319 thermosteric signal observed in ORAS5 below 2000m, we suspect that this product is  
 320 unreliable in its deep ocean variability.

321

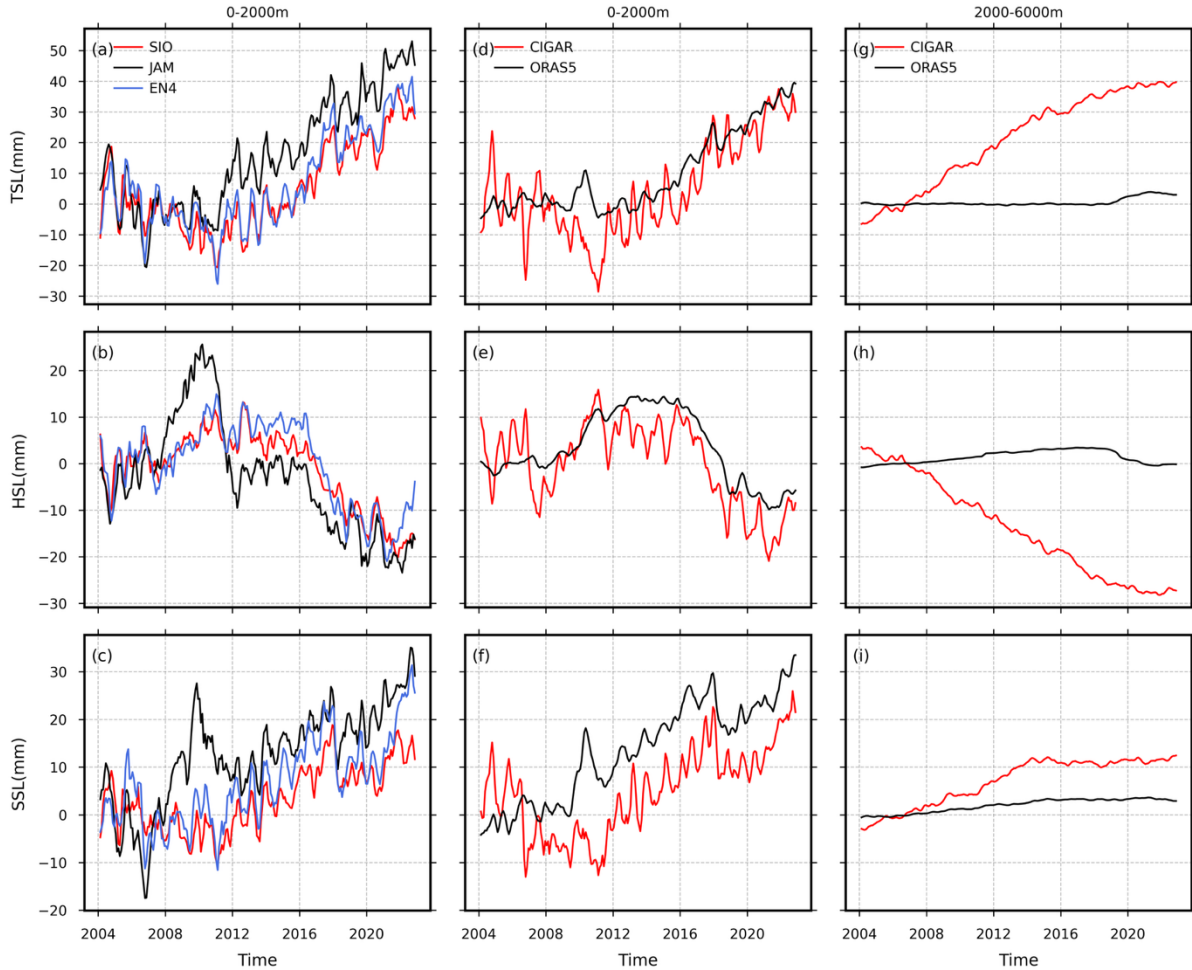

322

323 *Figure 4. Time series of thermosteric (a, d, g), halosteric (b, e, h), and steric (c, f, i) sea level*  
 324 *change in the North Atlantic. Panels (a–c) show the upper 2000 m derived from Argo products*  
 325 *(SIO, JAM, EN4), while panels (d–i) are derived from CIGAR and ORAS5 reanalyses for the*  
 326 *upper 2000 m (d–f) and the deep ocean 2000–6000 m (g–i). All time series have applied three-*  
 327 *month moving average filtering. Global mean trend is included.*

328 ***3.3 Comparison between the SIO steric trends and altimetry sea level trends corrected for***  
329 ***the manometric component***

330 In addition to directly obtaining the steric sea level trends, we can also derive it indirectly using  
331 the sea level budget equation (i.e., altimetry sea level minus manometric component computed  
332 at each grid mesh of the gridded products). In [Figure 5](#)~~Figure 5~~~~Figure 5~~, we compare the direct  
333 steric estimate from SIO with indirect estimates derived by subtracting different manometric  
334 products (GRACE or CIGAR) from altimetry ~~trend~~ data. It is important to note that the indirect  
335 method inherently includes deep ocean contribution and relies on independent observations.

336 From [Figure 5](#)~~Figure 5~~~~Figure 5~~, we clearly observe that the spatial trend pattern of SIO is more  
337 consistent with the “Altimetry minus CIGAR manometric” estimate, as both exhibit positive  
338 signals in the western North Atlantic. In contrast, the “Altimetry minus GRACE manometric”  
339 estimate displays a prominent positive signal in the eastern North Atlantic which is absent in  
340 the SIO data. This suggests that the GRACE manometric data contains substantial inaccuracies,  
341 particularly in the eastern North Atlantic, while “Altimetry minus CIGAR manometric” agrees  
342 rather well with the SIO steric trends. Such a result confirms previous finding based on the  
343 comparison between GRACE manometric trends and ‘Altimetry minus SIO-based steric’  
344 trends that already highlighted potential errors in GRACE data in the eastern North Atlantic  
345 (section 3.1).

346

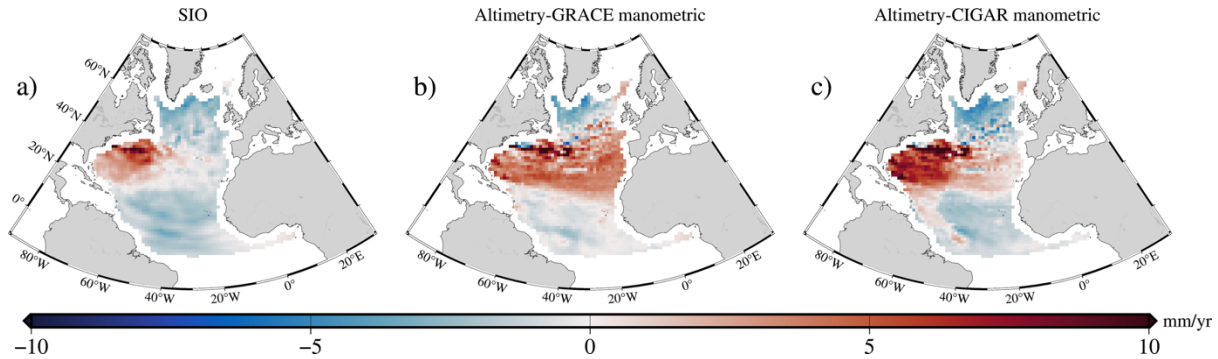

347

348 *Figure 5. Steric sea level trends derived directly from SIO and indirectly from Altimetry minus*  
 349 *manometric estimates (GRACE or CIGAR).*

350

351 To highlight this further, ~~Figure 6~~~~Figure 6~~~~Figure 6~~a, b shows the scatter plots between SIO  
 352 gridpoint steric trends and “Altimetry minus GRACE manometric” and “Altimetry minus  
 353 CIGAR manometric” grid point trends. The data have been normalized.

354 The scatter plots reveal distinct differences in the correlation between SIO observations and  
 355 Altimetry minus the the two manometric estimates. In the negative SIO region (corresponding

356 to the lower half of ~~Figure 6~~~~Figure 6~~~~Figure 6~~ and the negative values regions in ~~Figure 5~~~~Figure~~  
 357 ~~5~~~~Figure 5~~), where ~~most—points~~most points align with the diagonal in both cases, the

358 “Altimetry-CIGAR manometric” estimates points are clustered notably more tightly than  
 359 those in the “Altimetry-GRACE manometric” comparison. This indicates that in regions with

360 negative steric sea level change, where both estimates correlate with SIO, the “Altimetry-  
 361 CIGAR manometric” estimate maintains a higher spatial correlation compared to “Altimetry-  
 362 GRACE manometric”.

363 Notably, The abundance of data points in the quadrant characterized  
 364 by negative SIO and positive 'Altimetry-GRACE manometric' values particularly reflects the

365 situation eastern of the North Atlantic (Figure 5), where negative SIO observations are paired  
 366 with positive “Altimetry-GRACE manometric” estimates. In the positive SIO areas

366 (corresponding to the upper half of the plots), a portion of the data points in both estimates fall  
 367 below the 1:1 correspondence line exhibit values lower than the SIO observations (indicated

368 by points falling above the diagonal). However, this ~~deviation~~~~underestimation~~ is much more  
 369 pronounced for “~~Altmetry-GRACE manometric~~”, leading to a larger spread away from the  
 370 diagonal compared to  
 371 “~~Altmetry-CIGAR manometric~~”. This suggests that while the ~~linear consistency~~~~correlation~~  
 372 with SIO decreases for both products in positive steric sea level trend regions (such as the  
 373 western North Atlantic), the correlation of “~~Altmetry-GRACE~~~~manometric~~” is notably weaker  
 374 than that of “~~Altmetry-CIGAR manometric~~”.

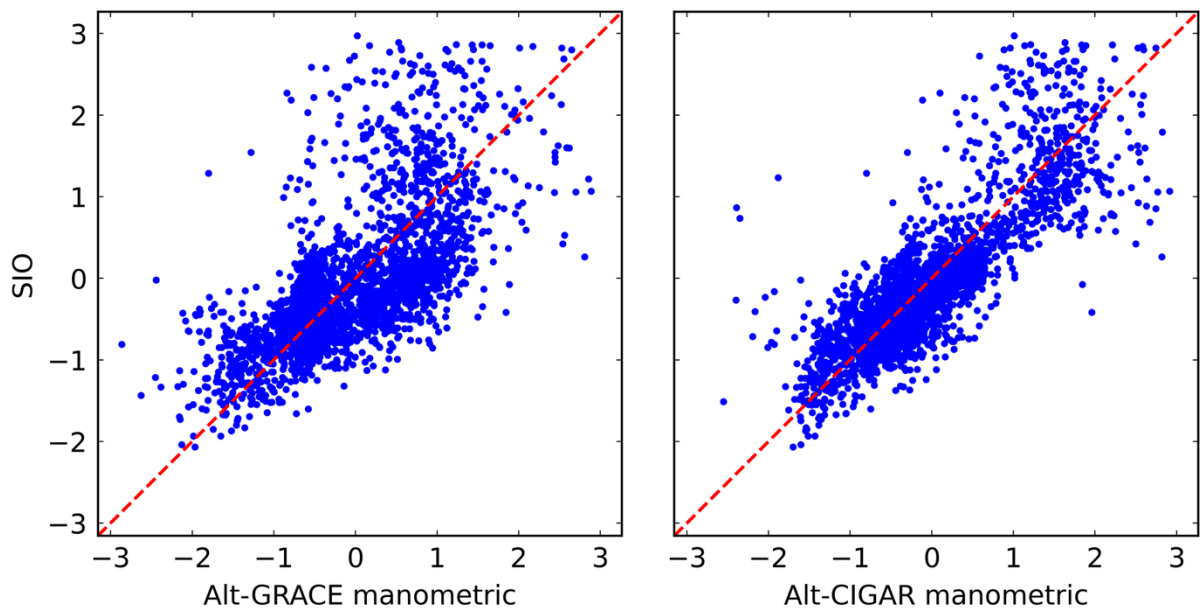

375

376 *Figure 6. Scatter plots of SIO steric sea level change versus Altmetry minus manometric*  
 377 *estimates (GRACE/left or CIGAR/right). The data have been normalized and outliers*  
 378 *exceeding  $3\sigma$  were removed.*

379

### 380 **3.4 Residual trend maps in the North Atlantic**

381 In this section, we utilize data from the observing systems described above to compute spatial  
 382 maps of the sea level budget residuals.

383 3.4.1 North Atlantic budget residuals *for* different manometric and steric (0-2000m)  
384 components

385 We computed the residuals by subtracting various combinations of manometric (GRACE,  
386 CIGAR) and steric (SIO, EN4, CIGAR, and ORAS5 upper 2000 m) components from the  
387 altimetry data (Figure 7).

388 As shown in Figure 7a,e, the resulting residuals implicitly include a deep ocean steric  
389 contribution, which is not accounted for since the steric data are limited here to the upper 2000  
390 m. This is consistent with previous results from Bouih et al. (2025), who observed positive  
391 residuals in the North Atlantic for both manometric cases., Similarly positive residuals are  
392 found in the eastern North Atlantic for the GRACE manometric component and in the western  
393 North Atlantic for the CIGAR manometric component.

394 From Figure 7, we also observe that the spatial distribution of the residuals remains similar  
395 when the manometric component is held fixed while varying the steric components. However,  
396 the residual magnitude is different. Specifically, when using the GRACE manometric  
397 component, the positive signal derived from SIO is stronger in the eastern North Atlantic  
398 compared to other steric products. When using the CIGAR manometric component, the  
399 positive signals from SIO and CIGAR are stronger in the western North Atlantic compared to  
400 EN4 and ORAS5.

401 To quantify the residuals, we computed the latitude-weighted spatial mean trend of each map.  
402 Results are shown in [Table 1](#)~~Table 1~~~~Table 1~~ (remind that results in [Table 1](#)~~Table 1~~~~Table 1~~ do  
403 not account for the global mean trends). From [Table 1](#)~~Table 1~~~~Table 1~~, we observe that  
404 regardless of the steric data used (whether from Argo or ocean reanalyses), the residuals  
405 derived using the CIGAR manometric component are always smaller than those derived using  
406 GRACE. Furthermore, for a given manometric component, the residual with SIO is larger than

407 that with EN4, even though SIO has corrected for the salinity drift since 2016. Besides, the  
 408 residual with CIGAR steric is larger than that with ORAS5.

409

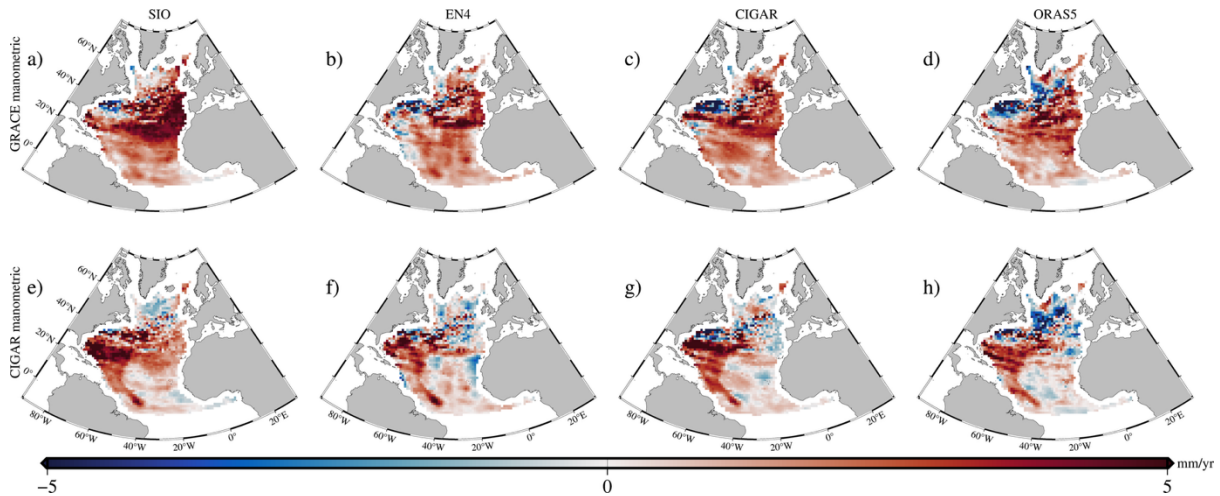

410

411 *Figure 7. Maps of sea level residuals (mm/yr) in the North Atlantic. The residuals are*  
 412 *calculated by subtracting manometric and steric components from satellite altimetry. The*  
 413 *manometric component is derived from GRACE (a–d) and CIGAR (e–h). These are combined*  
 414 *with upper 2000 m steric estimates from SIO (a, e), EN4 (b, f), CIGAR (c, g), and ORAS5 (d,*  
 415 *h).*

416

417

418 *Table 1. Trend values (mm/yr) of sea level residuals in the North Atlantic corresponding to*  
 419 *different steric products (0–2000m) and the two manometric components. Global mean trends*  
 420 *were removed. Uncertainties are 2-sigma errors of the least-squares fit.*

421

| Trend (mm/yr)       | SIO       | EN4       | CIGAR     | ORAS5     |
|---------------------|-----------|-----------|-----------|-----------|
| GRACE<br>manometric | 2.15±0.19 | 1.43±0.22 | 1.52±0.21 | 1.10±0.20 |
| CIGAR<br>manometric | 1.50±0.23 | 0.77±0.23 | 0.86±0.25 | 0.45±0.16 |

422

### 423 3.4.2 North Atlantic budget residuals and deep ocean steric contribution

424 In this section, we added the deep ocean steric sea level change to the upper 2000 m steric  
425 estimates, considering both the CIGAR and ORAS5 deep steric data, and using either GRACE  
426 or CIGAR for the manometric components. Resulting residual trends are shown in [Figure](#)  
427 ~~8Figure 8~~ . For all cases except the ORAS5 deep ocean case, -the residuals derived  
428 using GRACE manometric data ([Figure 8Figure 8Figure 8a-c](#)) show a dipole pattern (positive  
429 in the east, negative in the west) compared to the results without the deep ocean component  
430 (Figure 7). [Table 2Table 2Table 2](#) summarizes the residual trend values for all cases (as for  
431 [Table 1Table 1Table 1](#), remind that results in [Table 2Table 2Table 2](#) do not account for the  
432 global mean trends). Comparing results from [Table 1Table 1Table 1](#) and [Table 2Table 2Table](#)  
433 ~~2~~, we note that the mean residual magnitude is significantly reduced when the deep ocean steric  
434 change is included: by ~30% when using GRACE for the manometric component and SIO for  
435 the upper 0-2000m steric sea level, and by ~50% when using CIGAR for both the steric (full  
436 depth and manometric component). Based on CIGAR, the deep steric contribution to the North  
437 Atlantic sea level budget (in addition to the global mean deep ocean contribution) amounts to  
438  $0.62 \pm 0.04$  mm/yr.

439 In contrast, when using the CIGAR manometric component ([Figure 8Figure 8Figure 8e-h](#)), the  
440 residuals decrease significantly in both spatial variability and magnitude. Notably, the sea level  
441 budget is effectively nearly closed within error bars when combining CIGAR manometric and  
442 CIGAR steric data. Finally, it is worth noting that for SIO, positive residuals are observed in  
443 the eastern North Atlantic regardless of whether GRACE or CIGAR manometric data is used.  
444

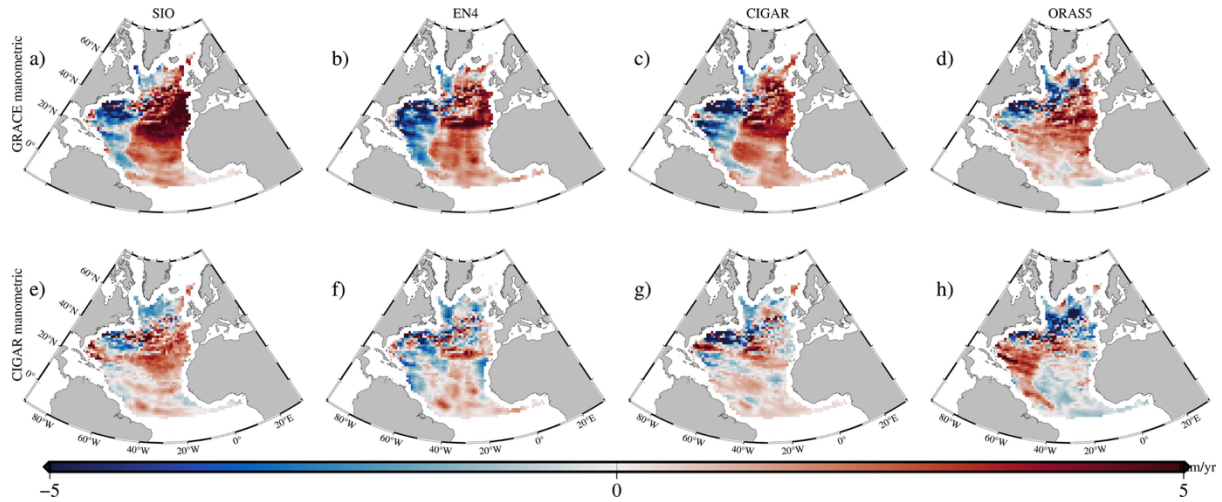

445

446 Figure 8. Maps of sea level residuals ( $\text{mm/yr}$ ) in the North Atlantic, calculated as in Figure 7  
 447 but with the inclusion of the deep ocean (below 2000 m) steric component. The deep ocean  
 448 contribution is derived from CIGAR for panels (a–c, e–g) and from ORAS5 for panels (d, h).  
 449 In panels a–c, the manometric component is from GRACE while it is from CIGAR in panels e–  
 450 h.

451

452 Table 2. Trend values ( $\text{mm/yr}$ ) over 2004–2022 of sea level residuals in the North Atlantic for  
 453 four steric products and two manometric components, accounting for the deep ocean. For SIO  
 454 and EN4, the deep ocean contribution from CIGAR is added. For CIGAR and ORAS5, their  
 455 own deep steric contributions are considered. Global mean trends removed. Uncertainties are  
 456 2-sigma errors of the least-squares fit.

457

| Trend ( $\text{mm/yr}$ ) | <u>SIO + CIGAR</u><br><u>Deep ocean</u> | <u>EN4 + CIGAR</u><br><u>Deep ocean</u> | <u>CIGAR</u><br><u>Full depth</u> | <u>ORAS5</u><br><u>Full depth</u> |
|--------------------------|-----------------------------------------|-----------------------------------------|-----------------------------------|-----------------------------------|
| GRACE<br>manometric      | $1.53 \pm 0.21$                         | $0.81 \pm 0.24$                         | $0.90 \pm 0.23$                   | $0.87 \pm 0.20$                   |
| CIGAR<br>manometric      | $0.88 \pm 0.20$                         | $0.15 \pm 0.21$                         | $0.24 \pm 0.22$                   | $0.22 \pm 0.15$                   |

### 458 *3.5 Time series of the North Atlantic mean sea level budget*

459 Based on the analysis above, the deep ocean contribution to the North Atlantic sea level budget  
 460 cannot be ignored. To assess the influence of the deep ocean on the sea level budget, we  
 461 computed time series for each component, including total sea level, manometric sea level,  
 462 thermosteric sea level, and halosteric sea level. Compared to results discussed above, here we  
 463 account for the global mean trend of each component.

#### 464 *3.5.1 North Atlantic mean sea level budget time series without deep ocean (global mean trends* 465 *included)*

466 Here, we have reintroduced the global mean trend of each component. Since the CIGAR  
 467 manometric component does not fully account for the external sea water mass addition to the  
 468 ocean due to land ice melt and terrestrial waters, we adopt GRACE data to represent the total  
 469 ~~ocean mass manometric sea level~~ change (i.e., global mean trend accounted for). Regarding the  
 470 steric sea level component, we selected the SIO product for Argo estimates, as it corrects for  
 471 the salinity drift. For ocean reanalyses, we only consider the CIGAR reanalysis.

472 ~~Figure 9Figure 9Figure 9~~ presents the sea level budget time series (global mean trends  
 473 accounted for) in the North Atlantic without the deep ocean steric sea level change. Residual  
 474 time series are also shown. The left/right panels use SIO/CIGAR steric sea level change in  
 475 upper 2000m. Comparing ~~Figure 9Figure 9Figure 9~~ left and right panels, we observe that the  
 476 halosteric components from SIO and CIGAR slightly differ. For SIO, a slight halosteric  
 477 decrease is observed over 2012-2015, with a linear trend of  $-1.10 \pm 0.94$  mm/yr during the such  
 478 period, then it increases to  $-3.20 \pm 0.9$  mm/yr over 2016-2022. Consequently, the SIO halosteric  
 479 trend over 2012-2022 amounts to  $-2.87 \pm 0.21$  mm/yr. In terms of global mean trend, the SIO  
 480 halosteric time series does not show any trend (as expected since the salinity drift is supposed  
 481 to be corrected). Thus, the SIO halosteric decrease observed in the North Atlantic may possibly  
 482 reflect a ~~truly~~ physical salinity increase. As of 2016, the CIGAR halosteric decrease is slightly

483 larger than for SIO, possibly a consequence of the salinity drift error not corrected for in the  
 484 assimilated EN4 salinity data. The mean residual trends amount to  $2.72 \pm 0.19$  mm/yr and  
 485  $2.34 \pm 0.21$  mm/yr for the SIO and CIGAR steric cases respectively, i.e., not significantly  
 486 different. [Results are gathered in Table 3.](#)  
 487

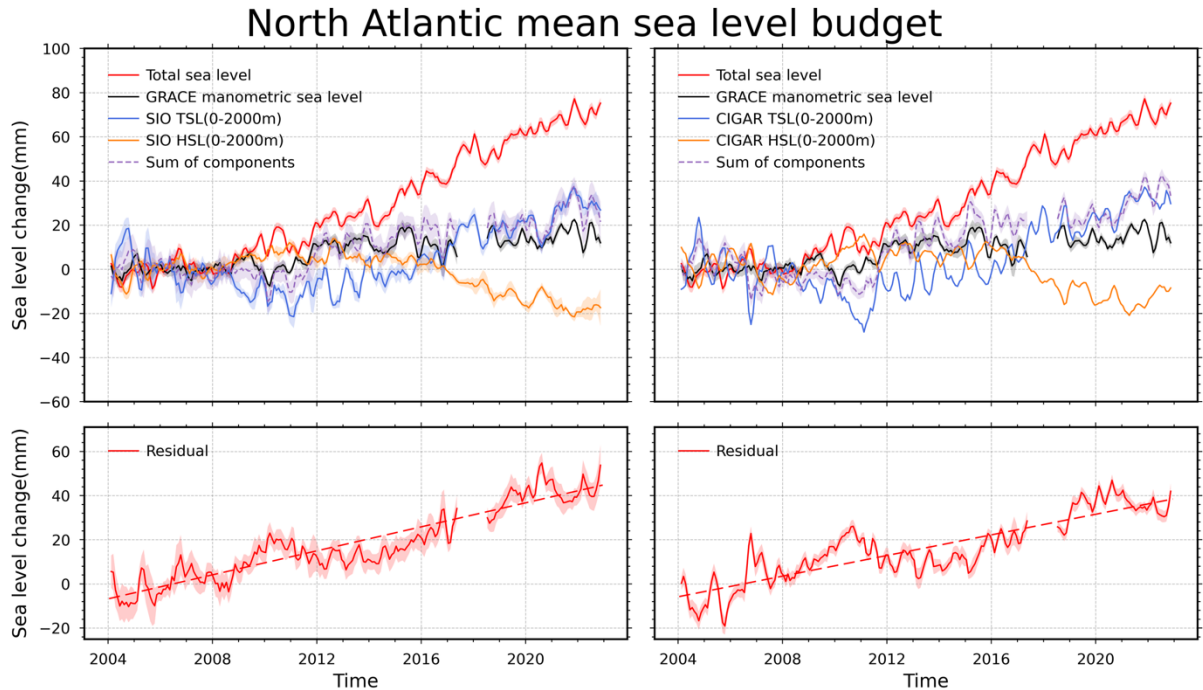

488

489 *Figure 9. Time series of North Atlantic sea level components (top) and residuals (bottom) for*  
 490 *the upper 2000m. The analysis uses Altimetry and GRACE ~~manometric~~ data, combined with*  
 491 *steric estimates from SIO (left) and CIGAR (right). All time series have applied three-month*  
 492 *moving average filtering. The global mean trend of each component is included.*

493

494 Table 3. Components of the North Atlantic sea level budget over 2004-2022  
 495 (upper ocean 0-2000m, Global mean trends included)

| <u>Components of the North Atlantic</u>                                    | <u>Linear trends (mm/yr)</u> |
|----------------------------------------------------------------------------|------------------------------|
| <u>Altimetry</u>                                                           | <u>4.45±0.16</u>             |
| <u>GRACE ocean mass</u>                                                    | <u>1.03±0.13</u>             |
| <u>Thermosteric SIO (0-2000m)/CIGAR (0-2000m)</u>                          | <u>1.76±0.27/1.92±0.29</u>   |
| <u>Halosteric SIO (0-2000m)/CIGAR (0-2000m)</u>                            | <u>-1.01±0.17/-0.8±0.19</u>  |
| <u>Sum of steric and mass components<br/>SIO (0-2000m)/CIGAR (0-2000m)</u> | <u>1.73±0.19/2.11±0.22</u>   |
| <u>Residuals<br/>SIO (0-2000m)/CIGAR (0-2000m)</u>                         | <u>2.72±0.19/2.34±0.21</u>   |

496

497 *3.5.2 North Atlantic sea level budget time series with the deep ocean contribution (global mean*  
 498 *trends included)*

499 In this section, we add the deep ocean contribution from the CIGAR reanalysis. As in section  
 500 3.5.1, the GRACE-based ocean mass ~~manometric~~ component is considered, and for the upper  
 501 2000m steric component, both SIO and CIGAR data are used. The corresponding sea level  
 502 budget time series for the North Atlantic are shown in Figure 10.

503 As illustrated in Figure 10, with the inclusion of the deep ocean contribution, the halosteric  
 504 decline in both panels become more evident compared to the case without the deep ocean.  
 505 Specifically, the CIGAR component also shows a slight decrease starting in 2012. However,  
 506 unlike the SIO trend, which maintains a relatively stable decline throughout the study time span,  
 507 the CIGAR decrease still exhibits a sudden intensification after 2016. Similarly, the  
 508 thermosteric sea level also displays a stronger ~~positive~~ ~~increasing~~ trend compared to the case  
 509 without the deep ocean.

510 Consequently, the total steric sea level trend is larger than in the case without the deep ocean  
 511 contribution. Finally, the inclusion of the deep ocean contribution leads to a reduction in the  
 512 North Atlantic residual trends for both cases: for the estimate based on SIO (upper 2000 m),  
 513 the trend decreases by about 30%, from  $2.72 \pm 0.19$  mm/yr to  $1.89 \pm 0.21$  mm/yr, whereas for  
 514 the estimate based on CIGAR, it drops from  $2.34 \pm 0.21$  mm/yr to  $1.51 \pm 0.23$  mm/yr.  
 515 Corresponding results are presented in Table 4.

516

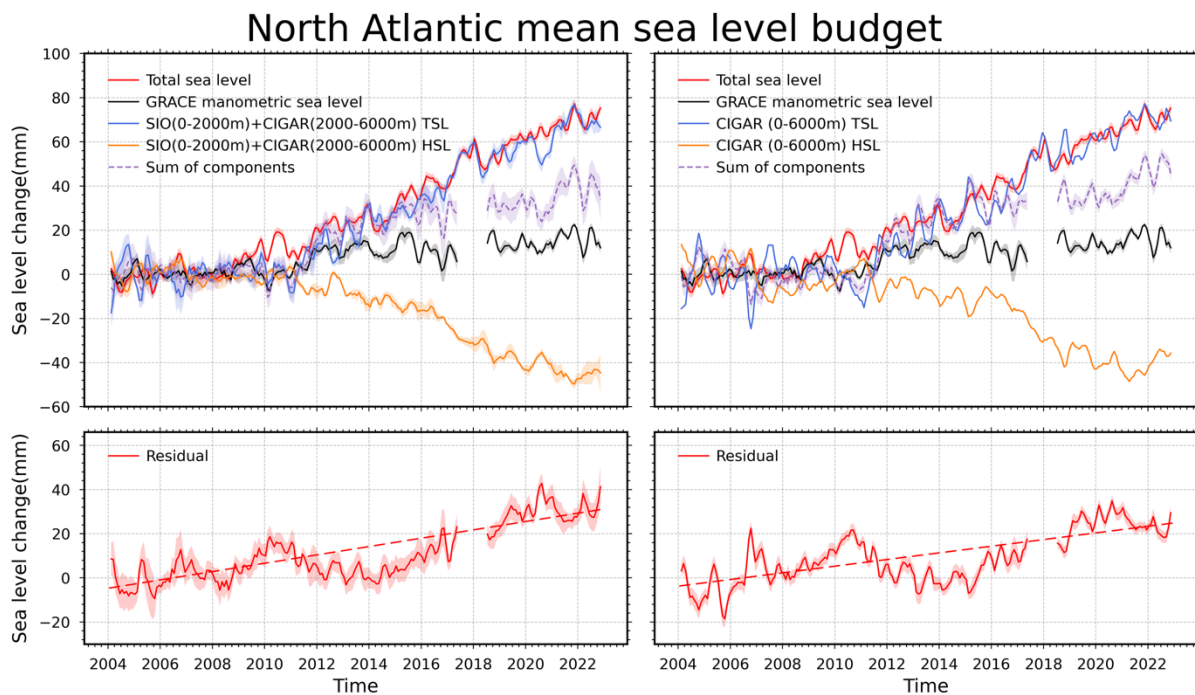

517

518 *Figure 10. Time series of North Atlantic sea level change components (top) and budget*  
 519 *residuals (bottom). The left panels use a hybrid steric estimate (SIO for 0–2000m combined*  
 520 *with CIGAR for 2000–6000m), while the right panels use the full-depth CIGAR steric estimate*  
 521 *(0–6000m). In both cases, Altimetry and GRACE ~~manometric~~ data are used. All time series*  
 522 *have applied three-month moving average filtering. The global mean trend of each component*  
 523 *is included.*

524

525 Table 4. Components of the North Atlantic sea level budget over 2004-2022  
 526 (full depth 0-6000m, Global mean trends included)

527

| <u>Components of the North Atlantic</u>                                                         | <u>Linear trends (mm/yr)</u>      |
|-------------------------------------------------------------------------------------------------|-----------------------------------|
| <u>Altimetry</u>                                                                                | <u>4.45 ± 0.16</u>                |
| <u>GRACE ocean mass</u>                                                                         | <u>1.03 ± 0.13</u>                |
| <u>Thermosteric SIO (0-2000m) + CIGAR (2000-6000m)/CIGAR Full depth</u>                         | <u>4.47 ± 0.24 / 4.64 ± 0.27</u>  |
| <u>Halosteric SIO (0-2000m) + CIGAR (2000-6000m)/CIGAR Full depth</u>                           | <u>-2.9 ± 0.16 / -2.68 ± 0.19</u> |
| <u>Sum of steric and mass components (with SIO 0-2000m + CIGAR 2000-6000m)/CIGAR Full depth</u> | <u>2.56 ± 0.19 / 2.94 ± 0.22</u>  |
| <u>Residuals (with SIO 0-2000m + CIGAR 2000-6000m)/CIGAR Full depth</u>                         | <u>1.89 ± 0.21 / 1.51 ± 0.23</u>  |

528

529 *3.5.3 Sea level budget of all oceans but without the North Atlantic Ocean, with the deep ocean*  
 530 *contribution added (global mean trends included).*

531 In (Bouih et al., 2025)'s study, the sea level budget for the global ocean excluding the North  
 532 Atlantic (without the deep ocean steric contribution) was not closed. In this section, we  
 533 consider the deep ocean steric sea level change contribution to the sea level budget. We  
 534 compute the sea level budget for the global ocean excluding the North Atlantic using the same  
 535 data products as in Section 3.5.2. The corresponding results are shown in Figure 11.

536 In the left panel (using SIO data for the upper 2000 m), we observe that the halosteric sea level  
 537 change is nearly zero. The residual is very small, estimated at  $0.16 \pm 0.08$  mm/yr. Thus,

538 considering the whole oceanic domain without the North Atlantic, the sea level budget is closed  
 539 when SIO data are used for the upper 2000 m ocean layer. In contrast, the right panel (using  
 540 CIGAR data for all depths) shows a distinct decrease in halosteric sea level starting in 2016,  
 541 due to the assimilation of EN4 data in CIGAR (not corrected for the salinity drift).  
 542 Nevertheless, the residual trend of the right panel is small ( $0.51 \pm 0.11$  mm/yr), suggesting quasi  
 543 closure of the sea level budget.

544

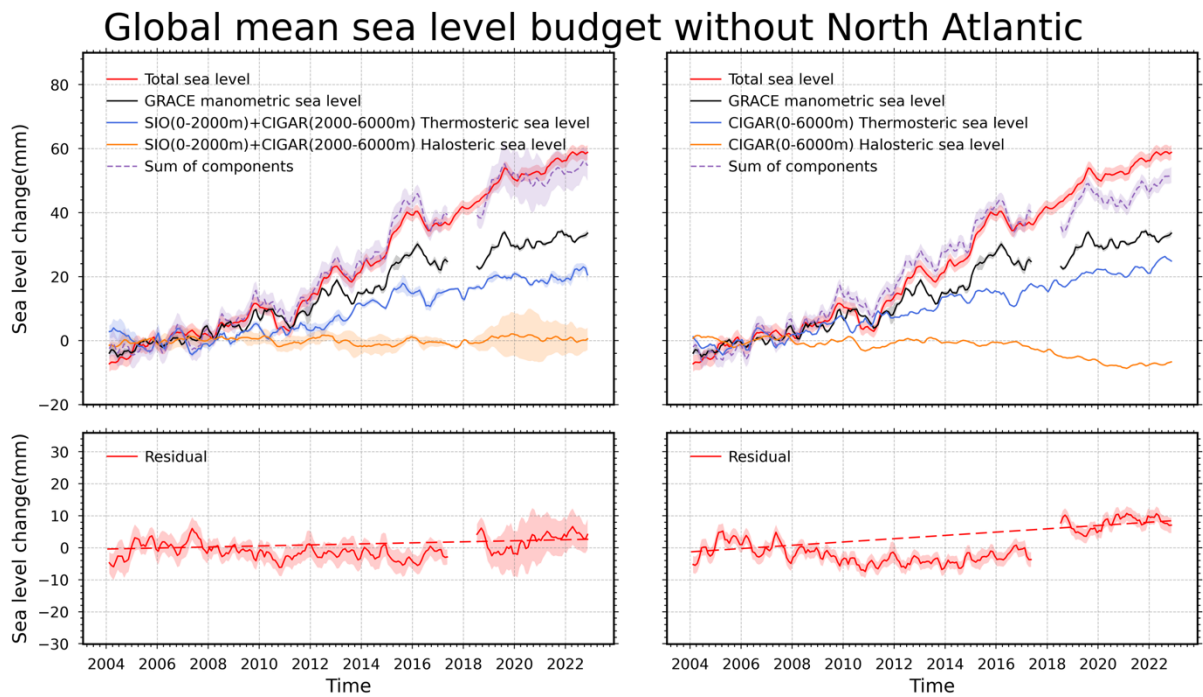

545

546 *Figure 11. Time series of sea level components (top) and residuals (bottom) for the global*  
 547 *ocean excluding the North Atlantic. The left panels use a hybrid steric estimate (SIO for 0–*  
 548 *2000 m combined with CIGAR for 2000–6000m), while the right panels use the full-depth*  
 549 *CIGAR estimate (0–6000m). All time series have applied three-month moving average filtering.*  
 550 *The global mean trend of each component is included.*

551

552 *3.5.4 North Atlantic sea level budget time series with the deep ocean contribution (global mean*  
553 *trends removed)*

554 Here, we compute the North Atlantic sea level budget (including the deep ocean contribution)  
555 with the global mean sea level trends of all components removed. The objective is to determine  
556 which part of the non-closure in the North Atlantic budget may result from errors in the regional  
557 components (i.e., independently from errors in the global mean trends). Figure 12 presents the  
558 budget time series using GRACE for the manometric component. We consider two steric cases:  
559 the hybrid case (SIO 0–2000 m plus CIGAR deep ocean) and the CIGAR full-depth case.  
560 The mean residual trends are estimated at  $1.53 \pm 0.21$  mm/yr for the hybrid steric case and  
561  $0.88 \pm 0.20$  mm/yr for the CIGAR full-depth case. Comparing these results (where global mean  
562 trends are removed) with those in Figure 10 (where global mean trends are included), we  
563 observe very little difference in the mean residual trends. This suggests that errors in the global  
564 mean trends are small, and that the reported residuals in the North Atlantic budget are primarily  
565 driven by component errors at the regional scale.

566

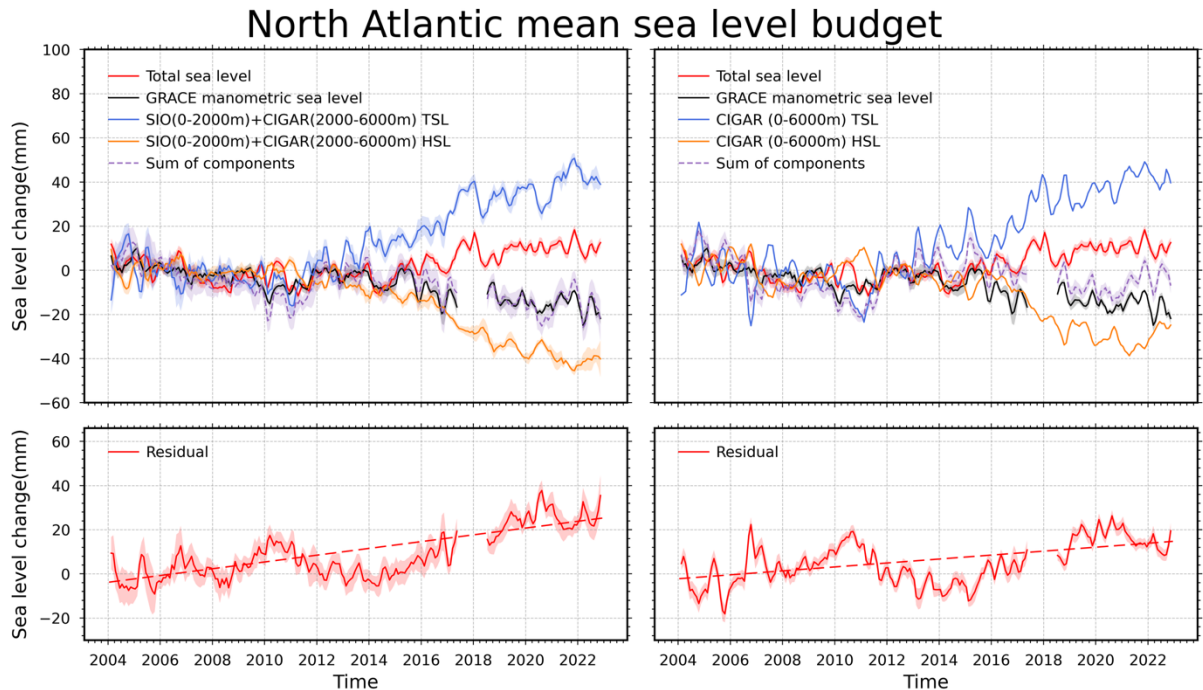

567

568 *Figure 12. Time series of North Atlantic sea level change components (top) and budget*  
 569 *residuals (bottom). The left panels use a hybrid steric estimate (SIO for 0–2000m combined*  
 570 *with CIGAR for 2000–6000m), while the right panels use the full-depth CIGAR steric estimate*  
 571 *(0–6000m). In both left and right panels, GRACE manometric components are considered. All*  
 572 *time series have applied three-month moving average filtering. The global mean trend of each*  
 573 *component is removed.*

574

575 Figure 13 displays the corresponding budget time series using CIGAR for the manometric  
 576 component. Similarly, we evaluate the residuals for both steric configurations. When using the  
 577 CIGAR manometric data, the mean residual trends amount to  $0.88 \pm 0.20$  mm/yr for the hybrid  
 578 steric case (SIO 0–2000 m plus CIGAR deep ocean) and  $0.24 \pm 0.22$  mm/yr for the CIGAR full-  
 579 depth case.

580

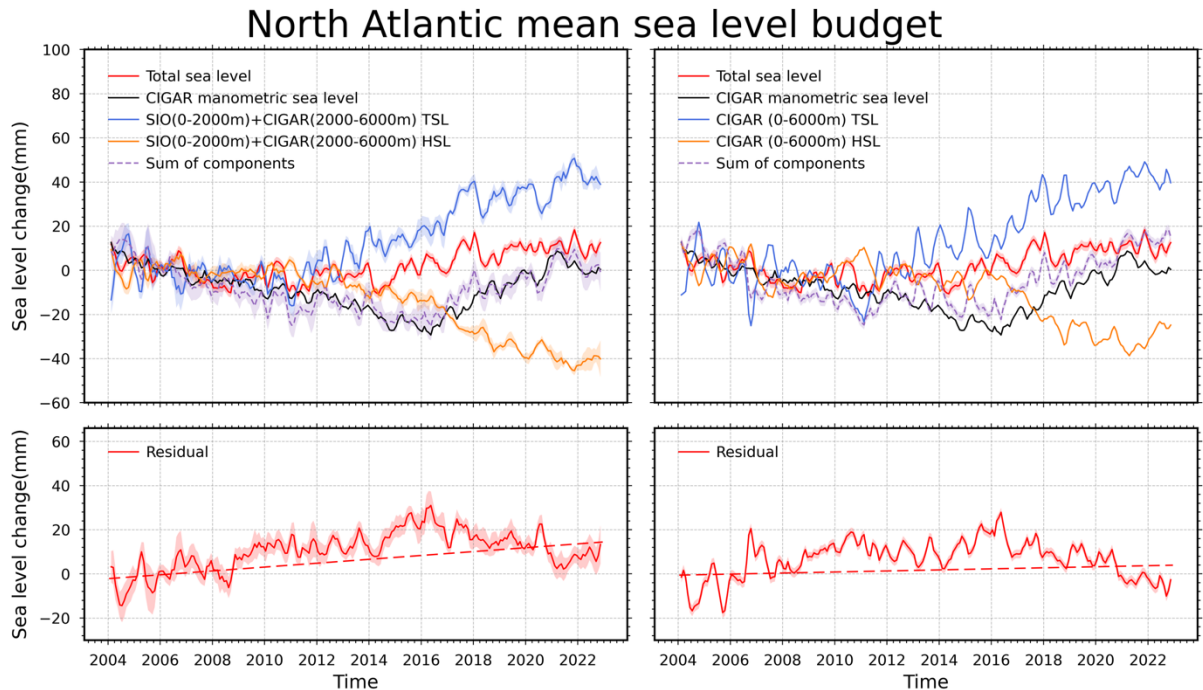

581

582 *Figure 13. Time series of North Atlantic sea level change components (top) and budget*  
 583 *residuals (bottom). The left panels use a hybrid steric estimate (SIO for 0–2000m combined*  
 584 *with CIGAR for 2000–6000m), while the right panels use the full-depth CIGAR steric estimate*  
 585 *(0–6000m). In both left and right panels, CIGAR manometric components are considered. All*  
 586 *time series have applied three-month moving average filtering. The global mean trend of each*  
 587 *component is removed.*

588

589 Comparing the results from Figure 12 and Figure 13, we note that using CIGAR for the  
 590 manometric component consistently leads to smaller regional residuals than using GRACE,  
 591 regardless of the steric product considered. It is worth noting that the configuration using  
 592 CIGAR for both manometric and steric components yields a mean residual trend of  $0.24 \pm 0.22$   
 593 mm/yr, nearly four times smaller than in the case where the GRACE manometric component  
 594 is used ( $0.90 \pm 0.23$  mm/yr). These results confirm our previous conclusions based on the  
 595 residual trend maps. [The trends of the residual time series for the different products of the sea](#)

596 level budget (global mean trends removed) are identical to those presented in Table 2 (gridded  
597 averages) and are not reproduced here.

598

599

#### 600 **4 Discussion**

601 In this study, we have revisited the sea level budget of the North Atlantic over the 2004-2022  
602 period, using a variety of different data sets. The objective was to further investigate the results  
603 from Bouih et al. (2025) who reported non-closure of the sea level budget in the North Atlantic  
604 over the same time span, and to identify which components of the budget (or which missing  
605 component) are responsible.

606 The main results of our study can be summarized as follows:

607 (1) By comparing the GRACE and CIGAR manometric trends with the ‘Altimetry minus  
608 steric sea level’, we note a better agreement (same positive sign) between the latter and  
609 the CIGAR-based manometric component in the northeastern Atlantic, while the  
610 GRACE manometric trends have an opposite (negative) sign in this region.

611 ~~(1)~~ (2) By comparing the SIO-based steric sea level trends with “Altimetry minus  
612 manometric sea level” in two cases (GRACE and CIGAR-based manometric component)  
613 over the North Atlantic, the use of CIGAR manometric sea level provides higher correlation  
614 than when using GRACE. This comparison together with the one presented in (1) indicates  
615 potential errors in the GRACE and GRACE-FO data, particularly in the eastern region of  
616 the North Atlantic basin where the manometric component is strongly negative. The cause  
617 is so far unknown but possibly related to the correction applied to GRACE data, e.g., the  
618 geocenter or GIA corrections. These needs dedicated investigation.

619 ~~(2)~~ (3) As of 2012, a ~~decreasingnegative~~ trend is observed in the SIO halosteric component  
620 which suggests a physically real increase in salinity of the North Atlantic. Again, this needs  
621 further investigation.

622 ~~(3)~~ (4) Our study shows that the deep ocean (>2000 m of depth) contribution to the North  
623 Atlantic sea level budget is not negligible and needs to be taken into account to obtain better  
624 closure of the sea level budget in this region. Based on CIGAR, the additional deep ocean  
625 steric contribution (above the global mean deep ocean contribution) to the North Atlantic  
626 sea level budget amounts to  $0.62 \pm 0.04$  mm/yr.

627 ~~(4)~~ (5) Accounting for the deep ocean steric contribution reduces by a factor of 30% the  
628 residuals of the North Atlantic sea level budget when using the GRACE manometric  
629 component, and by a factor of ~~50%~~ ~~two~~ when using CIGAR for the manometric component  
630 (and CIGAR full depth for the steric component). In the latter case, the mean residual trend  
631 over the North Atlantic is <1mm/yr, i.e., of the same order of magnitude as the regional  
632 trend error for altimetry gridded data according to Prandi et al. (2021). We can thus  
633 conclude that the closure of the sea level budget holds within the data uncertainties in this  
634 case.

635 ~~(5)~~ (6) Our results also indicate that the main contribution to the mean North Atlantic  
636 residual trend comes from errors on the regional components (whatever the products used  
637 for the components) rather than from errors in the global mean trends.

638 ~~(6)~~ (7) The North Atlantic sea level budget is closed within data uncertainties when using  
639 the CIGAR reanalysis for both the manometric and steric components.

640 ~~(7)~~ (8) Our study also shows that the sea level budget of all other oceans (North Atlantic  
641 excluded) is almost closed when accounting for the deep ocean steric contribution based  
642 on the CIGAR ocean reanalysis

643

644 To conclude, ~~t~~These new findings represent a step further towards better understanding of the  
645 present-day sea level budget in the North Atlantic region. ~~The~~ese investigations also support  
646 the need to better observe the deep ocean especially in the North Atlantic Ocean which is one  
647 of the objectives of the One Argo Project (Thierry et al., 2025). Nevertheless, some issues still  
648 merit deeper investigation. We can quote the followings, among others: Why GRACE  
649 manometric data give less good results in the Northeast Atlantic than the CIGAR-based  
650 manometric sea level? Which inaccurate correction applied to GRACE is involved? Is it related  
651 to the GIA or the geocenter corrections applied to GRACE? What causes the slight salinity  
652 increase observed in the North Atlantic (full depth) with SIO data? Can we explain the physical  
653 process causing the reported CIGAR-based positive deep ocean steric sea level? What is the  
654 impact on the CIGAR steric component estimates of the use of EN4 (with no salinity drift  
655 correction applied) in the assimilation procedure? What is the source of the (small) remaining  
656 residual trend of the North Atlantic sea level budget (after accounting for the deep ocean)?  
657 Clearly, future studies should be devoted to try answering these puzzling questions.

658

659 **Author contributions**

660 AC, WL and ZS designed the study. All analyses have been performed by ZS. ZS and AC  
661 wrote a first version of the manuscript. All co-authors contributed to the discussion of the  
662 results, editing and final writing of the manuscript.

663

664 **Competing interests**

665 The contact author has declared that none of the authors has any competing interests.

666

667 **Acknowledgements**

668 The authors thank two anonymous reviewers for helpful comments that significantly improved  
669 the manuscript. Zhe Song is supported by China Scholarship Council. This study is a  
670 contribution to the ongoing ESA (European Space Agency) CCI (Climate Change Initiative)  
671 project entitled ‘Sea level budget closure CCI+ (SLBC\_CCI+)’. This work is a contribution to  
672 the GREAT project funded by CNES through the Ocean Surface Topography Science Team  
673 (OSTST).

674

675 **References**

- 676 Adhikari, S., Ivins, E. R., Frederikse, T., Landerer, F. W., and Caron, L.: Sea-level fingerprints  
677 emergent from GRACE mission data, *Earth System Science Data*, 11, 629–646,  
678 <https://doi.org/10.5194/essd-11-629-2019>, 2019.
- 679 Barnoud, A., Pfeffer, J., Guérou, A., Frery, M., Siméon, M., Cazenave, A., Chen, J., Llovel,  
680 W., Thierry, V., Legeais, J., and Ablain, M.: Contributions of Altimetry and Argo to Non-  
681 Closure of the Global Mean Sea Level Budget Since 2016, *Geophysical Research Letters*, 48,  
682 <https://doi.org/10.1029/2021gl092824>, 2021.
- 683 Bouih, M., Barnoud, A., Yang, C., Storto, A., Blazquez, A., Llovel, W., Fraudeau, R., and  
684 Cazenave, A.: Regional sea level trend budget over 2004–2022, *Ocean Sci.*, 21, 1425–1440,  
685 <https://doi.org/10.5194/os-21-1425-2025>, 2025.
- 686 Brown, S., Willis, J., and Fournier, S.: Jason-3 Wet Path Delay Correction,  
687 <https://doi.org/10.5067/J3L2G-PDCOR>, 2023.
- 688 Camargo, C. M. L., Riva, R. E. M., Hermans, T. H. J., Schütt, E. M., Marcos, M., Hernandez-  
689 Carrasco, I., and Slangen, A. B. A.: Regionalizing the sea-level budget with machine learning  
690 techniques, *Ocean Science*, 19, 17–41, <https://doi.org/10.5194/os-19-17-2023>, 2023.
- 691 Chen, J., Tapley, B., Seo, K., Wilson, C., and Ries, J.: Improved Quantification of Global Mean  
692 Ocean Mass Change Using GRACE Satellite Gravimetry Measurements, *Geophys. Res. Lett.*,  
693 46, 13984–13991, <https://doi.org/10.1029/2019GL085519>, 2019.
- 694 Chen, J., Tapley, B., Wilson, C., Cazenave, A., Seo, K.-W., and Kim, J.-S.: Global Ocean Mass  
695 Change From GRACE and GRACE Follow-On and Altimeter and Argo Measurements,  
696 *Geophysical Research Letters*, 47, e2020GL090656, <https://doi.org/10.1029/2020GL090656>,  
697 2020.
- 698 Cheng, L., Zhu, J., Cowley, R., Boyer, T., and Wijffels, S.: Time, Probe Type, and Temperature  
699 Variable Bias Corrections to Historical Expendable Bathythermograph Observations, *Journal*

700 of Atmospheric and Oceanic Technology, 31, 1793–1825, <https://doi.org/10.1175/JTECH-D->  
701 13-00197.1, 2014.

702 Dieng, H. B., Cazenave, A., Meyssignac, B., and Ablain, M.: New estimate of the current rate  
703 of sea level rise from a sea level budget approach, *Geophysical Research Letters*, 44, 3744–  
704 3751, <https://doi.org/10.1002/2017GL073308>, 2017.

705 Dobslaw, H., Bergmann-Wolf, I., Dill, R., Poropat, L., Thomas, M., Dahle, C., Esselborn, S.,  
706 König, R., and Flechtner, F.: A new high-resolution model of non-tidal atmosphere and ocean  
707 mass variability for de-aliasing of satellite gravity observations: AOD1B RL06, *Geophysical*  
708 *Journal International*, 211, 263–269, <https://doi.org/10.1093/gji/ggx302>, 2017.

709 Flechtner, F., Dobslaw, H., and Fagiolini, E.: GRACE AOD1B product description document  
710 for product release 05, 2014.

711 Frederikse, T., Riva, R., Kleinherenbrink, M., Wada, Y., van den Broeke, M., and Marzeion,  
712 B.: Closing the sea level budget on a regional scale: Trends and variability on the Northwestern  
713 European continental shelf, *Geophysical Research Letters*, 43, 10,864–10,872,  
714 <https://doi.org/10.1002/2016GL070750>, 2016.

715 Gregory, J. M., Griffies, S. M., Hughes, C. W., Lowe, J. A., Church, J. A., Fukimori, I., Gomez,  
716 N., Kopp, R. E., Landerer, F., Cozannet, G. L., Ponte, R. M., Stammer, D., Tamisiea, M. E.,  
717 and van de Wal, R. S. W.: Concepts and Terminology for Sea Level: Mean, Variability and  
718 Change, Both Local and Global, *Surv Geophys*, 40, 1251–1289,  
719 <https://doi.org/10.1007/s10712-019-09525-z>, 2019.

720 Hamlington, B. D., Gardner, A. S., Ivins, E., Lenaerts, J. T. M., Reager, J. T., Trossman, D. S.,  
721 Zaron, E. D., Adhikari, S., Arendt, A., Aschwanden, A., Beckley, B. D., Bekaert, D. P. S.,  
722 Blewitt, G., Caron, L., Chambers, D. P., Chandanpurkar, H. A., Christianson, K., Csatho, B.,  
723 Cullather, R. I., DeConto, R. M., Fasullo, J. T., Frederikse, T., Freymueller, J. T., Gilford, D.  
724 M., Giroto, M., Hammond, W. C., Hock, R., Holschuh, N., Kopp, R. E., Landerer, F., Larour,  
725 E., Menemenlis, D., Merrifield, M., Mitrovica, J. X., Nerem, R. S., Nias, I. J., Nieves, V.,

726 Nowicki, S., Pangaluru, K., Piecuch, C. G., Ray, R. D., Rounce, D. R., Schlegel, N.-J.,  
727 Seroussi, H., Shirzaei, M., Sweet, W. V., Velicogna, I., Vinogradova, N., Wahl, T., Wiese, D.  
728 N., and Willis, M. J.: Understanding of Contemporary Regional Sea-Level Change and the  
729 Implications for the Future, *Reviews of Geophysics*, 58, e2019RG000672,  
730 <https://doi.org/10.1029/2019RG000672>, 2020.

731 Horwath, M., Gutknecht, B. D., Cazenave, A., Palanisamy, H. K., Marti, F., Marzeion, B.,  
732 Paul, F., Le Bris, R., Hogg, A. E., Ootosaka, I., Shepherd, A., Döll, P., Cáceres, D., Müller  
733 Schmied, H., Johannessen, J. A., Nilsen, J. E. Ø., Raj, R. P., Forsberg, R., Sandberg Sørensen,  
734 L., Barletta, V. R., Simonsen, S. B., Knudsen, P., Andersen, O. B., Rannald, H., Rose, S. K.,  
735 Merchant, C. J., Macintosh, C. R., von Schuckmann, K., Novotny, K., Groh, A., Restano, M.,  
736 and Benveniste, J.: Global sea-level budget and ocean-mass budget, with a focus on advanced  
737 data products and uncertainty characterisation, *Earth System Science Data*, 14, 411–447,  
738 <https://doi.org/10.5194/essd-14-411-2022>, 2022.

739 Liu, C., Liang, X., Chambers, D., and Ponte, R.: Global Patterns of Spatial and Temporal  
740 Variability in Salinity from Multiple Gridded Argo Products, *Journal of Climate*,  
741 <https://doi.org/10.1175/JCLI-D-20-0053.1>, 2020.

742 Llovel, W. and Hochet, A.: Salinity Contribution to Regional Sea Level Trends in the Tropical  
743 Southwestern Pacific Ocean Over 2014–2023, *Geophysical Research Letters*, 52,  
744 e2025GL116115, <https://doi.org/10.1029/2025GL116115>, 2025.

745 Llovel, W., Balem, K., Tajouri, S., and Hochet, A.: Cause of Substantial Global Mean Sea  
746 Level Rise Over 2014–2016, *Geophysical Research Letters*, 50, e2023GL104709,  
747 <https://doi.org/10.1029/2023GL104709>, 2023.

748 McDougall, T. J., Barker, P. M., Marine, CSIRO., and Research, A.: Getting started with  
749 TEOS-10 and the gibbs seawater (GSW) oceanographic toolbox, Trevor J. McDougall, 2011.

750 Mu, D., Church, J. A., King, M., Ludwigsen, C. B., and Xu, T.: Contrasting Discrepancy in the  
751 Sea Level Budget Between the North and South Atlantic Ocean Since 2016, *Earth and Space*  
752 *Science*, 11, e2023EA003133, <https://doi.org/10.1029/2023EA003133>, 2024.

753 Nerem, R. S., Beckley, B. D., Fasullo, J. T., Hamlington, B. D., Masters, D., and Mitchum, G.  
754 T.: Climate-change–driven accelerated sea-level rise detected in the altimeter era, *Proceedings*  
755 *of the National Academy of Sciences*, 115, 2022–2025,  
756 <https://doi.org/10.1073/pnas.1717312115>, 2018.

757 Pardaens, A. K., Gregory, J. M., and Lowe, J. A.: A model study of factors influencing  
758 projected changes in regional sea level over the twenty-first century, *Clim Dyn*, 36, 2015–2033,  
759 <https://doi.org/10.1007/s00382-009-0738-x>, 2011.

760 Peltier, W. R., Argus, D. F., and Drummond, R.: Comment on “An Assessment of the ICE-  
761 6G\_C (VM5a) Glacial Isostatic Adjustment Model” by Purcell et al.: The ICE-6G\_C (VM5a)  
762 GIA model, *J. Geophys. Res. Solid Earth*, 123, 2019–2028,  
763 <https://doi.org/10.1002/2016JB013844>, 2018.

764 Ponte, R. M., Sun, Q., Liu, C., and Liang, X.: How Salty Is the Global Ocean: Weighing It All  
765 or Tasting It a Sip at a Time?, *Geophysical Research Letters*, 48, e2021GL092935,  
766 <https://doi.org/10.1029/2021GL092935>, 2021.

767 Roemmich, D. and Gilson, J.: The 2004–2008 mean and annual cycle of temperature, salinity,  
768 and steric height in the global ocean from the Argo Program, *Progress in Oceanography*, 82,  
769 81–100, <https://doi.org/10.1016/j.pocean.2009.03.004>, 2009.

770 Royston, S., Dutt Vishwakarma, B., Westaway, R., Rougier, J., Sha, Z., and Bamber, J.: Can  
771 We Resolve the Basin-Scale Sea Level Trend Budget From GRACE Ocean Mass?, *Journal of*  
772 *Geophysical Research: Oceans*, 125, e2019JC015535, <https://doi.org/10.1029/2019JC015535>,  
773 2020.

774 Storto, A. and Yang, C.: Acceleration of the ocean warming from 1961 to 2022 unveiled by  
775 large-ensemble reanalyses, *Nat Commun*, 15, 545, [https://doi.org/10.1038/s41467-024-44749-](https://doi.org/10.1038/s41467-024-44749-7)  
776 7, 2024.

777 Sun, Y., Riva, R., and Ditmar, P.: Optimizing estimates of annual variations and trends in  
778 geocenter motion and  $J_2$  from a combination of GRACE data and geophysical models, *J.*  
779 *Geophys. Res. Solid Earth*, 121, 8352–8370, <https://doi.org/10.1002/2016JB013073>, 2016.

780 Tapley, B., Watkins, M., Flechtner, F., Reigber, C., Bettadpur, S., Rodell, M., Sasgen, I.,  
781 Famiglietti, J., Landerer, F., Chambers, D., Reager, J., Gardner, A., Save, H., Ivins, E.,  
782 Swenson, S., Boening, C., Dahle, C., Wiese, D., Dobslaw, H., and Velicogna, I.: Contributions  
783 of GRACE to understanding climate change, *Nature Climate Change*, 5,  
784 <https://doi.org/10.1038/s41558-019-0456-2>, 2019.

785 Thierry, V., Claustre, H., Pasqueron De Fommervault, O., Zilberman, N., Johnson, K. S., King,  
786 B. A., Wijffels, S. E., Bhaskar, U. T. V. S., Balmaseda, M. A., Belbeoch, M., Bollard, M.,  
787 Boutin, J., Boyd, P., Cancouët, R., Chai, F., Ciavatta, S., Crane, R., Cravatte, S., Dall’Olmo,  
788 G., Desbruyères, D., Durack, P. J., Fassbender, A. J., Fennel, K., Fujii, Y., Gasparin, F.,  
789 González-Santana, A., Gourcuff, C., Gray, A., Hewitt, H. T., Jayne, S. R., Johnson, G. C.,  
790 Kolodziejczyk, N., Le Boyer, A., Le Traon, P.-Y., Llovel, W., Lozier, M. S., Lyman, J. M.,  
791 McDonagh, E. L., Martin, A. P., Meyssignac, B., Mogenssen, K. S., Morris, T., Oke, P. R.,  
792 Smith, W. O., Owens, B., Poffa, N., Post, J., Roemmich, D., Rykaczewski, R. R.,  
793 Sathyendranath, S., Scanderbeg, M., Scheurle, C., Schofield, O., Von Schuckmann, K.,  
794 Scourse, J., Sprintall, J., Suga, T., Tonani, M., Van Wijk, E., Xing, X., and Zuo, H.: Advancing  
795 ocean monitoring and knowledge for societal benefit: the urgency to expand Argo to OneArgo  
796 by 2030, *Front. Mar. Sci.*, 12, 1593904, <https://doi.org/10.3389/fmars.2025.1593904>, 2025.

797 Wang, C., Dong, S., and Munoz, E.: Seawater density variations in the North Atlantic and the  
798 Atlantic meridional overturning circulation, *Clim Dyn*, 34, 953–968,  
799 <https://doi.org/10.1007/s00382-009-0560-5>, 2010.

800 WCRP: Global sea-level budget 1993–present, *Earth System Science Data*, 10, 1551–1590,  
801 <https://doi.org/10.5194/essd-10-1551-2018>, 2018.

802 Wong, A. P. S., Gilson, J., and Cabanes, C.: Argo salinity: bias and uncertainty evaluation,  
803 *Earth System Science Data*, 15, 383–393, <https://doi.org/10.5194/essd-15-383-2023>, 2023.

804 Wunsch, C., Ponte, R. M., and Heimbach, P.: Decadal Trends in Sea Level Patterns: 1993–  
805 2004, *Journal of Climate*, 20, 5889–5911, <https://doi.org/10.1175/2007JCLI1840.1>, 2007.

806 Zuo, H., Balmaseda, M. A., Tietsche, S., Mogensen, K., and Mayer, M.: The ECMWF  
807 operational ensemble reanalysis–analysis system for ocean and sea ice: a description of the  
808 system and assessment, *Ocean Science*, 15, 779–808, <https://doi.org/10.5194/os-15-779-2019>,  
809 2019.

810

811

812
